# Supplementary material for: Ascl1 phospho-status regulates neuronal differentiation in a Xenopus developmental model of neuroblastoma
Source: PubMed Central journal article supplement (PMC4415893; doi:10.1242/dmm.018630), 2015-05-01
Supplement: supp_8.5.429_DMM018630.pdf [file supp_8.5.429_DMM018630.pdf]

**Figure. S1. Sox10 expression on the dorsal region of Xenopus embryos**

Xenopus embryos were fertilised and allowed to develop to the indicated developmental stage before fixing and staining by in situ hybridisation for neural crest marker Sox10. Embryos are orientated with the dorsal side imaged and head to the top.

**Figure. S2. Comparison of Ascl1 serine-proline sites across species**

Ascl1 protein is illustrated schematically across species with serine-proline pairs indicated in green. Ascl1 phosphomutant forms were generated by performing site-directed mutagenesis changing all indicated serine-proline pairs to alanine-proline.

**Figure. S3. Scoring standards for AVNA marker expression comparing the injected and uninjected sides**

In situ hybridisation scoring standards for each marker are shown above. Each embryo from Figures 1, 3, 6 & 7 were assigned a numeric score based as indicated above.

**Table S1. Primers used in qPCR analysis of gene expression.**

Primers were designed for qPCR of Ascl1 in neuroblastoma cell lines. Primers were designed to have a T<sub>m</sub> between 57°C and 60°C. HPRT1 and GAPDH were used as 'house-keeping' controls.

S1

Stage

14/15

16/17

18/19

20/21

22/23

Sox10

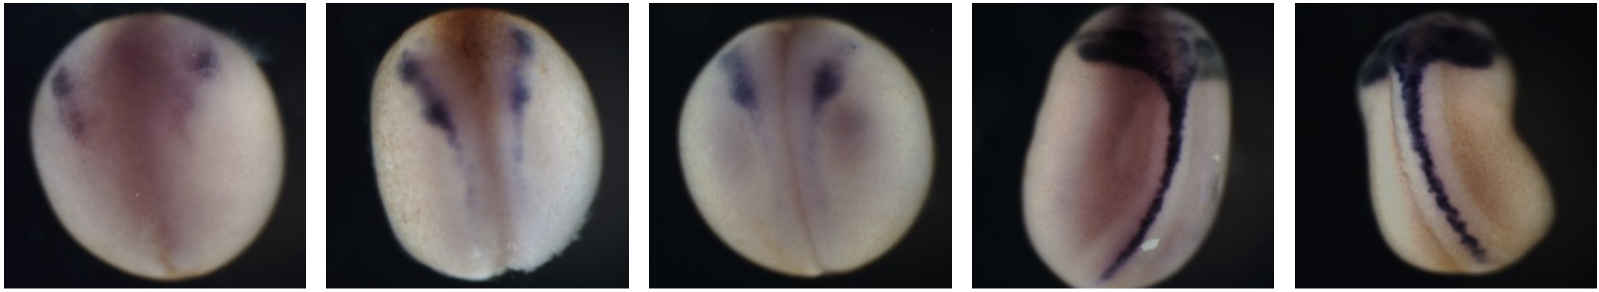

Figure S1

S2

Ascl1 (*X. laevis*) 199 aa.

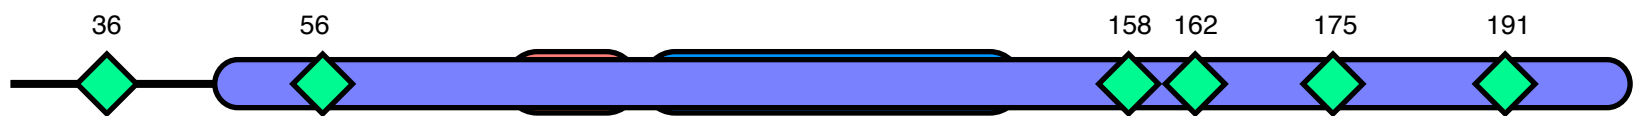

Ascl1 (mouse) 231 aa.

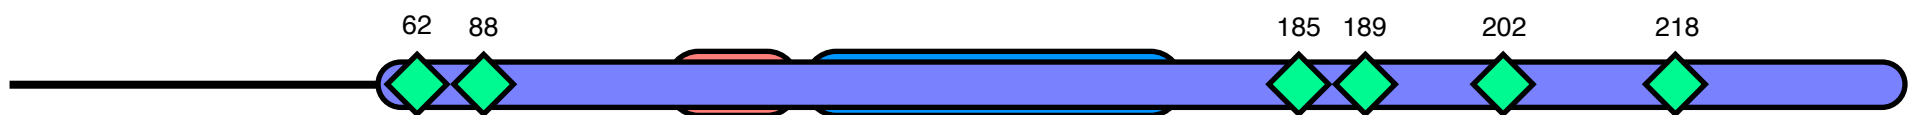

Ascl1 (human) 236 aa.

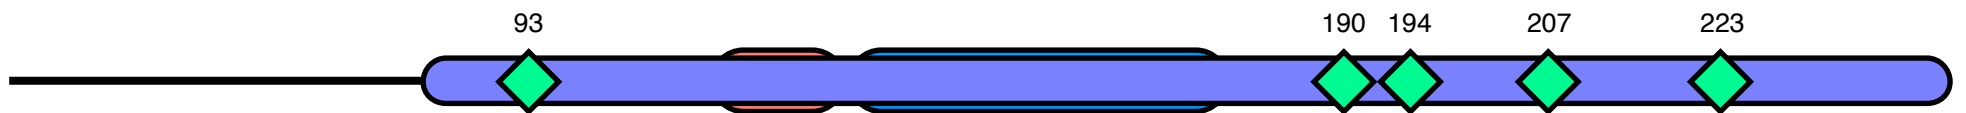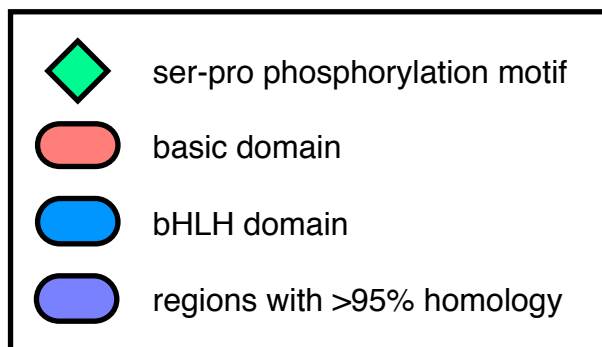

Figure S2

S3

| Marker                   | -2                                                                                 | -1                                                                                   | 0                                                                                     | +1                                                                                   | +2                                                                                   |
|--------------------------|------------------------------------------------------------------------------------|--------------------------------------------------------------------------------------|---------------------------------------------------------------------------------------|--------------------------------------------------------------------------------------|--------------------------------------------------------------------------------------|
| Neural- $\beta$ -tubulin |                                                                                    | 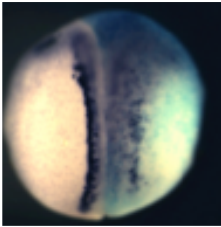   |    |   |   |
| Phox2a                   |                                                                                    |    |    |   |   |
| Hand2                    |   |    |    |   |   |
| TH                       |  |   |   |  |  |
| Slug                     |                                                                                    |  |  |                                                                                      |                                                                                      |
| Snail                    |                                                                                    |  |  |                                                                                      |                                                                                      |
| FoxD3                    |                                                                                    |  |  |                                                                                      |                                                                                      |

Figure S3

| Gene   | Forward/Reverse | Sequence             |
|--------|-----------------|----------------------|
| hASCL1 | Forward         | CATCTCCCCCAACTACTCCA |
| hASCL1 | Reverse         | AACGCCACTGACAAGAAAGC |
| HPRT1  | Forward         | TGGCGTCGTGATTAGTGATG |
| HPRT1  | Reverse         | ATCCAGCAGGTCAGCAAAG  |
| GAPDH  | Forward         | GAAGGTGAAGGTCGGAGTC  |
| GAPDH  | Reverse         | TGGAAGATGGTGATGGGATT |

**Table S1**
